# Supplementary material
Source: ML conference proceedings conference paper supplement (https://openreview.net/forum?id=hX5Ia-ION8Y)
Supplement: supplementary_material [file attachment]

## A Appendix

We provide some additional information regarding model size, memory requirements, batch size and computation times in Table 8. This is followed by additional results and visualizations for SMMNIST, KTH, BAIR, UCF-101 and CityScapes. Further results, images and videos are also provided in the supplementary material.

### A.1 Computational requirements

Table 8: Compute used. "steps" indicates the checkpoint with the best approximate FVD, "GPU hours" is the total training time up to "steps".

| Dataset,<br>model | params | CPU mem<br>(GB) | batch<br>size | GPU        | GPU mem<br>(GB) | steps  | GPU<br>hours |
|-------------------|--------|-----------------|---------------|------------|-----------------|--------|--------------|
| SMMNIST concat    | 27.9M  | 3.6             | 64            | Tesla V100 | 14.5            | 700000 | 78.9         |
| SMMNIST spatin    | 53.9M  | 3.3             | 64            | RTX 8000   | 23.4            | 140000 | 39.7         |
| KTH concat        | 62.8M  | 3.2             | 64            | Tesla V100 | 21.5            | 400000 | 65.7         |
| KTH spatin        | 367.6M | 8.9             | 64            | A100       | 145.9           | 340000 | 45.8         |
| BAIR concat       | 251.2M | 5.1             | 64            | Tesla V100 | 76.5            | 450000 | 78.2         |
| BAIR spatin       | 328.6M | 9.2             | 64            | A100       | 86.1            | 390000 | 50.0         |
| Cityscapes concat | 262.1M | 6.2             | 64            | Tesla V100 | 78.2            | 900000 | 192.83       |
| Cityscapes spatin | 579.1M | 8.9             | 64            | A100       | 101.2           | 650000 | 96.0         |
| UCF concat        | 565.0M | 8.9             | 64            | Tesla V100 | 100.1           | 900000 | 183.95       |
| UCF spatin        | 739.4M | 8.9             | 64            | A100       | 115.2           | 550000 | 79.5         |

### A.2 Stochastic Moving MNIST

In Table 9 we provide results for more configurations of our proposed approach on the SMMNIST evaluation. In Figure 5 we provide some visual results for SMMNIST.

Table 9: Results on the SMMNIST evaluation, conditioned on 5 past frames, predicting 10 frames using models trained to predict 5 frames at a time.

| SMMNIST [5 $\rightarrow$ 10; trained on 5] | FVD $\downarrow$ | PSNR $\uparrow$ | SSIM $\uparrow$ | LPIPS $\downarrow$ | MSE $\downarrow$ |
|--------------------------------------------|------------------|-----------------|-----------------|--------------------|------------------|
| MCVD concat                                | $25.63 \pm 0.69$ | 17.22           | 0.786           | 0.117              | 0.024            |
| MCVD concat past-future-mask               | $20.77 \pm 0.77$ | 16.33           | 0.753           | 0.139              | 0.028            |
| MCVD spatin                                | $23.86 \pm 0.67$ | 17.07           | 0.785           | 0.129              | 0.025            |
| MCVD spatin future-mask                    | $44.14 \pm 1.73$ | 16.31           | 0.758           | 0.141              | 0.027            |
| MCVD spatin past-future-mask               | $36.12 \pm 0.63$ | 16.15           | 0.748           | 0.146              | 0.027            |

[illegible]

Figure 5: SMMNIST  $5 \rightarrow 10$ , trained on 5; prediction

Table 10: Full table: Results on the KTH evaluation, predicting, 30 and 40 frames using models trained to predict  $k$  frames at a time. All models condition on 10 past frames. SSIM numbers are updated from the main text after fixing a bug in the calculation.

| <b>KTH</b> [10 $\rightarrow$ <i>pred</i> ; trained on $k$ ] | $k$      | <i>pred</i> | FVD $\downarrow$ | PSNR $\uparrow$ | SSIM $\uparrow$ |
|-------------------------------------------------------------|----------|-------------|------------------|-----------------|-----------------|
| SV2P [Babaeizadeh et al., 2018b]                            | 10       | 30          | $636 \pm 1$      | 28.2            | 0.838           |
| SVG-LP [Denton and Fergus, 2018]                            | 10       | 30          | $377 \pm 6$      | 28.1            | 0.844           |
| SAVP [Lee et al., 2018]                                     | 10       | 30          | $374 \pm 3$      | 26.5            | 0.756           |
| <b>MCVD</b> spatin (Ours)                                   | <b>5</b> | 30          | $323 \pm 3$      | 27.5            | 0.835           |
| <b>MCVD</b> concat past-future-mask (Ours)                  | <b>5</b> | 30          | 294.9            | 24.3            | 0.746           |
| SLAMP [Akan et al., 2021]                                   | 10       | 30          | $228 \pm 5$      | 29.4            | 0.865           |
| SRVP [Franceschi et al., 2020]                              | 10       | 30          | $222 \pm 3$      | 29.7            | 0.870           |
| Struct-vRNN [Minderer et al., 2019]                         | 10       | 40          | 395.0            | 24.29           | 0.766           |
| <b>MCVD</b> concat past-future-mask (Ours)                  | <b>5</b> | 40          | 368.4            | 23.48           | 0.720           |
| <b>MCVD</b> spatin (Ours)                                   | <b>5</b> | 40          | $331.6 \pm 5$    | 26.40           | 0.744           |
| <b>MCVD</b> concat (Ours)                                   | <b>5</b> | 40          | $276.6 \pm 3$    | 26.20           | 0.793           |
| SV2P time-invariant [Babaeizadeh et al., 2018b]             | 10       | 40          | 253.5            | 25.70           | 0.772           |
| SV2P time-variant [Babaeizadeh et al., 2018b]               | 10       | 40          | 209.5            | 25.87           | 0.782           |
| SAVP [Lee et al., 2018]                                     | 10       | 40          | 183.7            | 23.79           | 0.699           |
| SVG-LP [Denton and Fergus, 2018]                            | 10       | 40          | 157.9            | 23.91           | 0.800           |
| SAVP-VAE [Lee et al., 2018]                                 | 10       | 40          | 145.7            | 26.00           | 0.806           |
| Grid-keypoints [Gao et al., 2021]                           | 10       | 40          | 144.2            | 27.11           | 0.837           |

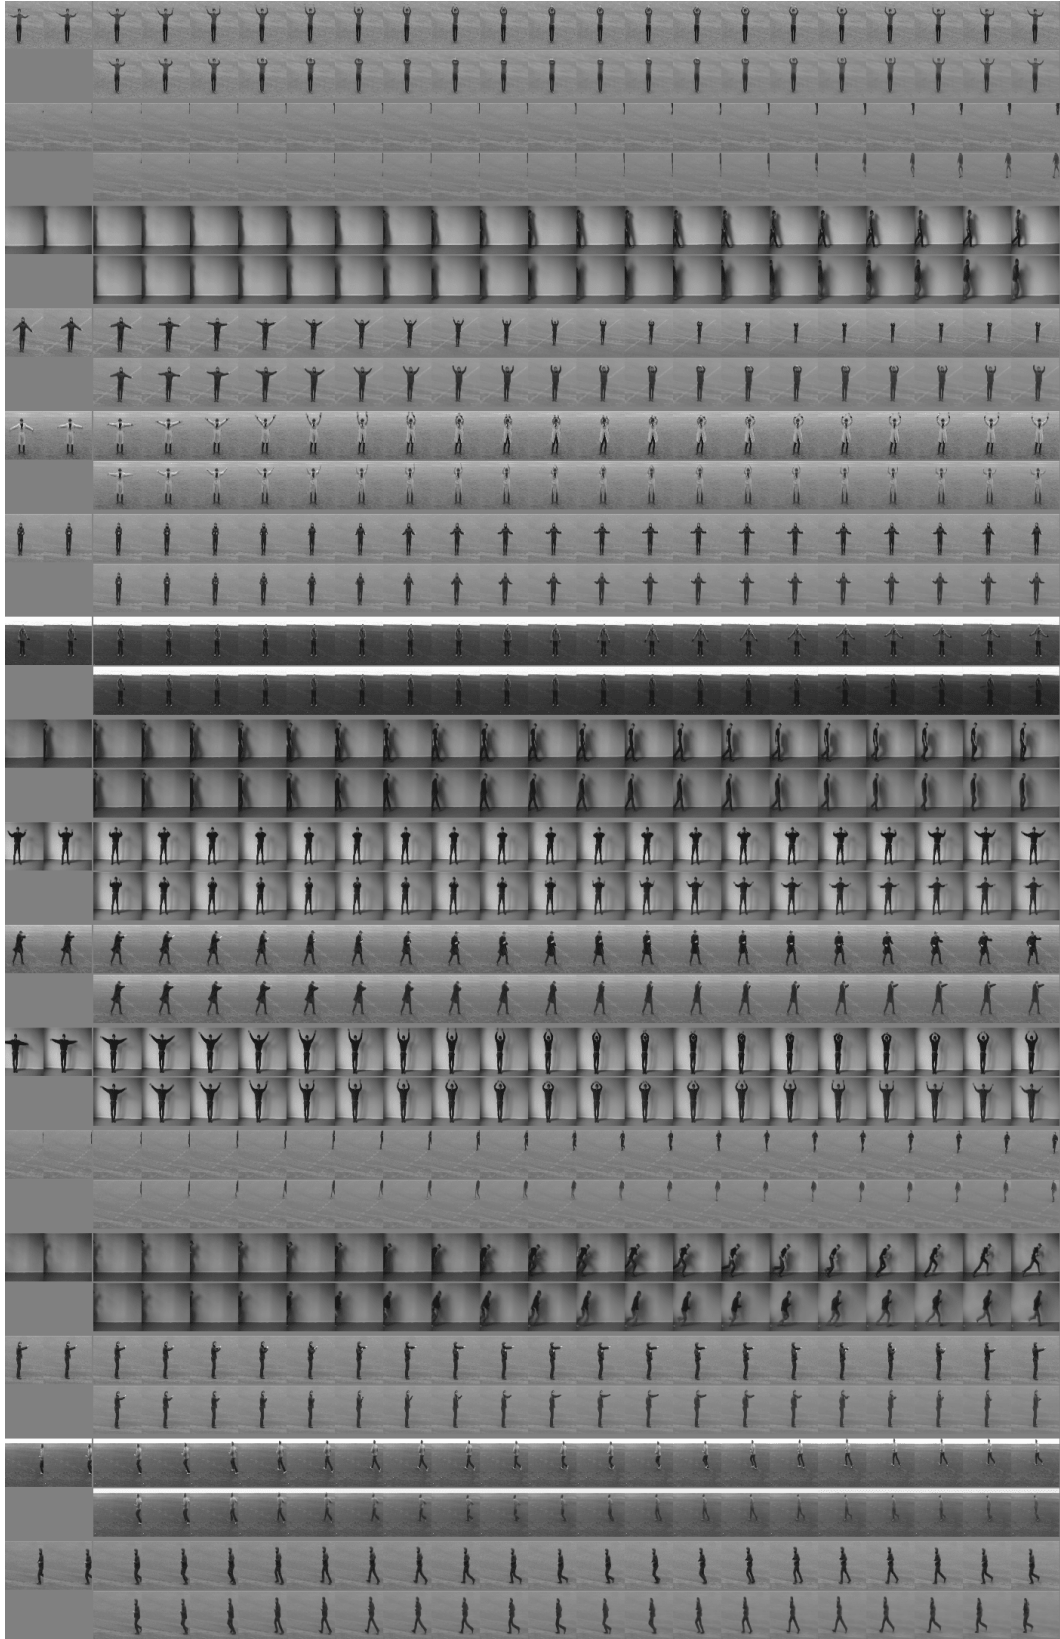

Figure 6: **KTH** 5  $\rightarrow$  20, trained on 5 (prediction)

561 **A.4 BAIR**562 Table 11: Full table: Results on the BAIR evaluation conditioning on  $p$  past frames and predict  $pr$  frames in the future, using models trained to predict  $k$  frames at at time.

| BAIR [past (p) $\rightarrow$ pred (pr) ; trained on k] | p | k        | pr | FVD $\downarrow$   | PSNR $\uparrow$ | SSIM $\uparrow$ |
|--------------------------------------------------------|---|----------|----|--------------------|-----------------|-----------------|
| LVT [Rakhimov et al., 2020]                            | 1 | 15       | 15 | 125.8              | –               | –               |
| DVD-GAN-FP [Clark et al., 2019]                        | 1 | 15       | 15 | 109.8              | –               | –               |
| <b>MCVD</b> spatin (Ours)                              | 1 | <b>5</b> | 15 | 103.8              | 18.8            | 0.826           |
| TrIVD-GAN-FP [Luc et al., 2020]                        | 1 | 15       | 15 | 103.3              | –               | –               |
| VideoGPT [Yan et al., 2021]                            | 1 | 15       | 15 | 103.3              | –               | –               |
| CCVS [Le Moing et al., 2021]                           | 1 | 15       | 15 | 99.0               | –               | –               |
| <b>MCVD</b> concat (Ours)                              | 1 | <b>5</b> | 15 | 98.8               | 18.8            | 0.829           |
| <b>MCVD</b> spatin past-mask (Ours)                    | 1 | <b>5</b> | 15 | 96.5               | 18.8            | 0.828           |
| <b>MCVD</b> concat past-mask (Ours)                    | 1 | <b>5</b> | 15 | 95.6               | 18.8            | 0.832           |
| Video Transformer [Weissenborn et al., 2019]           | 1 | 15       | 15 | 94-96 <sup>a</sup> | –               | –               |
| FitVid [Babaeizadeh et al., 2021]                      | 1 | 15       | 15 | 93.6               | –               | –               |
| <b>MCVD</b> concat past-future-mask (Ours)             | 1 | <b>5</b> | 15 | <b>89.5</b>        | 16.9            | 0.780           |
| SAVP [Lee et al., 2018]                                | 2 | 14       | 14 | 116.4              | –               | –               |
| <b>MCVD</b> spatin (Ours)                              | 2 | <b>5</b> | 14 | 94.1               | 19.1            | 0.836           |
| <b>MCVD</b> spatin past-mask (Ours)                    | 2 | <b>5</b> | 14 | 90.5               | 19.2            | 0.837           |
| <b>MCVD</b> concat (Ours)                              | 2 | <b>5</b> | 14 | 90.5               | 19.1            | 0.834           |
| <b>MCVD</b> concat past-future-mask (Ours)             | 2 | <b>5</b> | 14 | 89.6               | 17.1            | 0.787           |
| <b>MCVD</b> concat past-mask (Ours)                    | 2 | <b>5</b> | 14 | <b>87.9</b>        | 19.1            | 0.838           |
| SVG-LP [Akan et al., 2021]                             | 2 | 10       | 28 | 256.6              | –               | 0.816           |
| SVG [Akan et al., 2021].                               | 2 | 12       | 28 | 255.0              | 18.95           | 0.8058          |
| SLAMP [Akan et al., 2021]                              | 2 | 10       | 28 | 245.0              | 19.7            | 0.818           |
| SRVP [Franceschi et al., 2020]                         | 2 | 12       | 28 | 162.0              | 19.6            | 0.820           |
| WAM [Jin et al., 2020]                                 | 2 | 14       | 28 | 159.6              | 21.0            | 0.844           |
| SAVP [Lee et al., 2018]                                | 2 | 12       | 28 | 152.0              | 18.44           | 0.7887          |
| vRNN 1L Castrejón et al. [2019]                        | 2 | 10       | 28 | 149.2              | –               | 0.829           |
| SAVP [Lee et al., 2018]                                | 2 | 10       | 28 | 143.4              | –               | 0.795           |
| Hier-vRNN [Castrejón et al., 2019]                     | 2 | 10       | 28 | 143.4              | –               | 0.822           |
| <b>MCVD</b> spatin (Ours)                              | 2 | <b>5</b> | 28 | 132.1              | 17.5            | 0.779           |
| <b>MCVD</b> spatin past-mask (Ours)                    | 2 | <b>5</b> | 28 | 127.9              | 17.7            | 0.789           |
| <b>MCVD</b> concat (Ours)                              | 2 | <b>5</b> | 28 | 120.6              | 17.6            | 0.785           |
| <b>MCVD</b> concat past-mask (Ours)                    | 2 | <b>5</b> | 28 | 119.0              | 17.7            | 0.797           |
| <b>MCVD</b> concat past-future-mask (Ours)             | 2 | <b>5</b> | 28 | <b>118.4</b>       | 16.2            | 0.745           |

<sup>a</sup> 94 on only the first frames, 96 on all subsequences of test frames

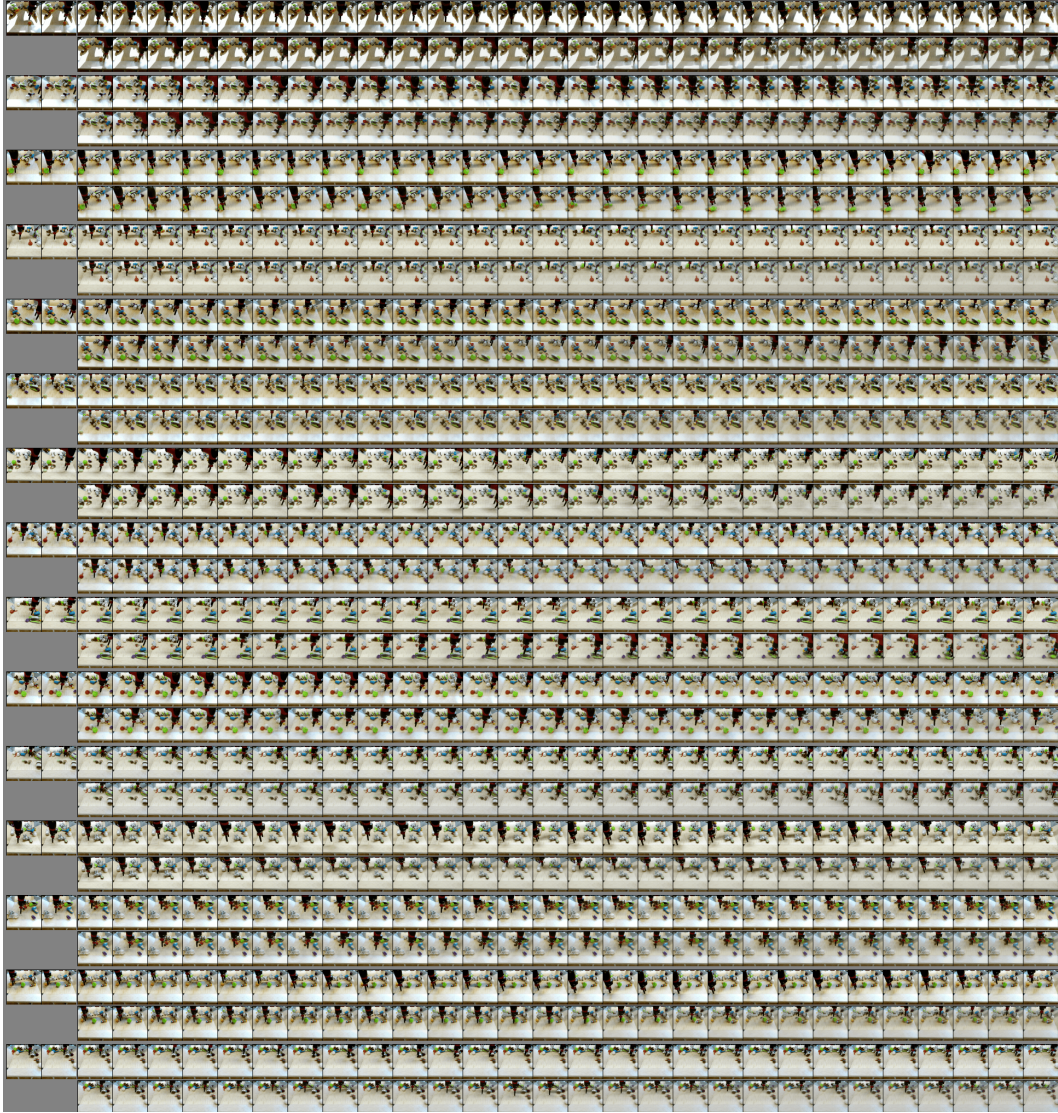

Figure 7: **BAIR**  $2 \rightarrow 28$ , trained on 5 (prediction)

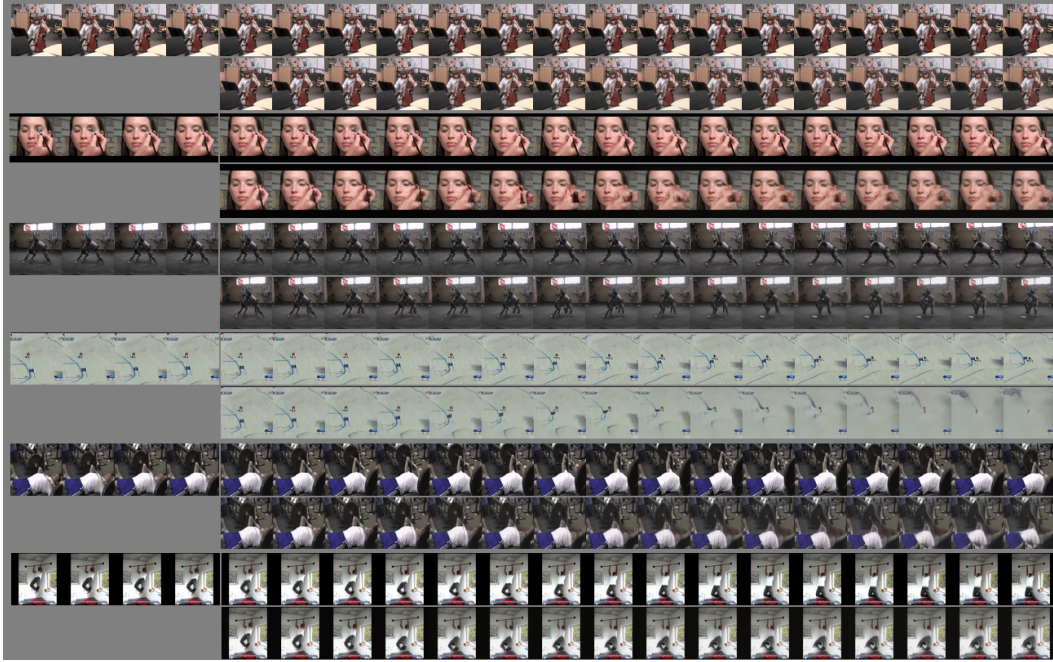

Figure 8: **UCF-101**  $4 \rightarrow 16$ , trained on 4 (**prediction**)

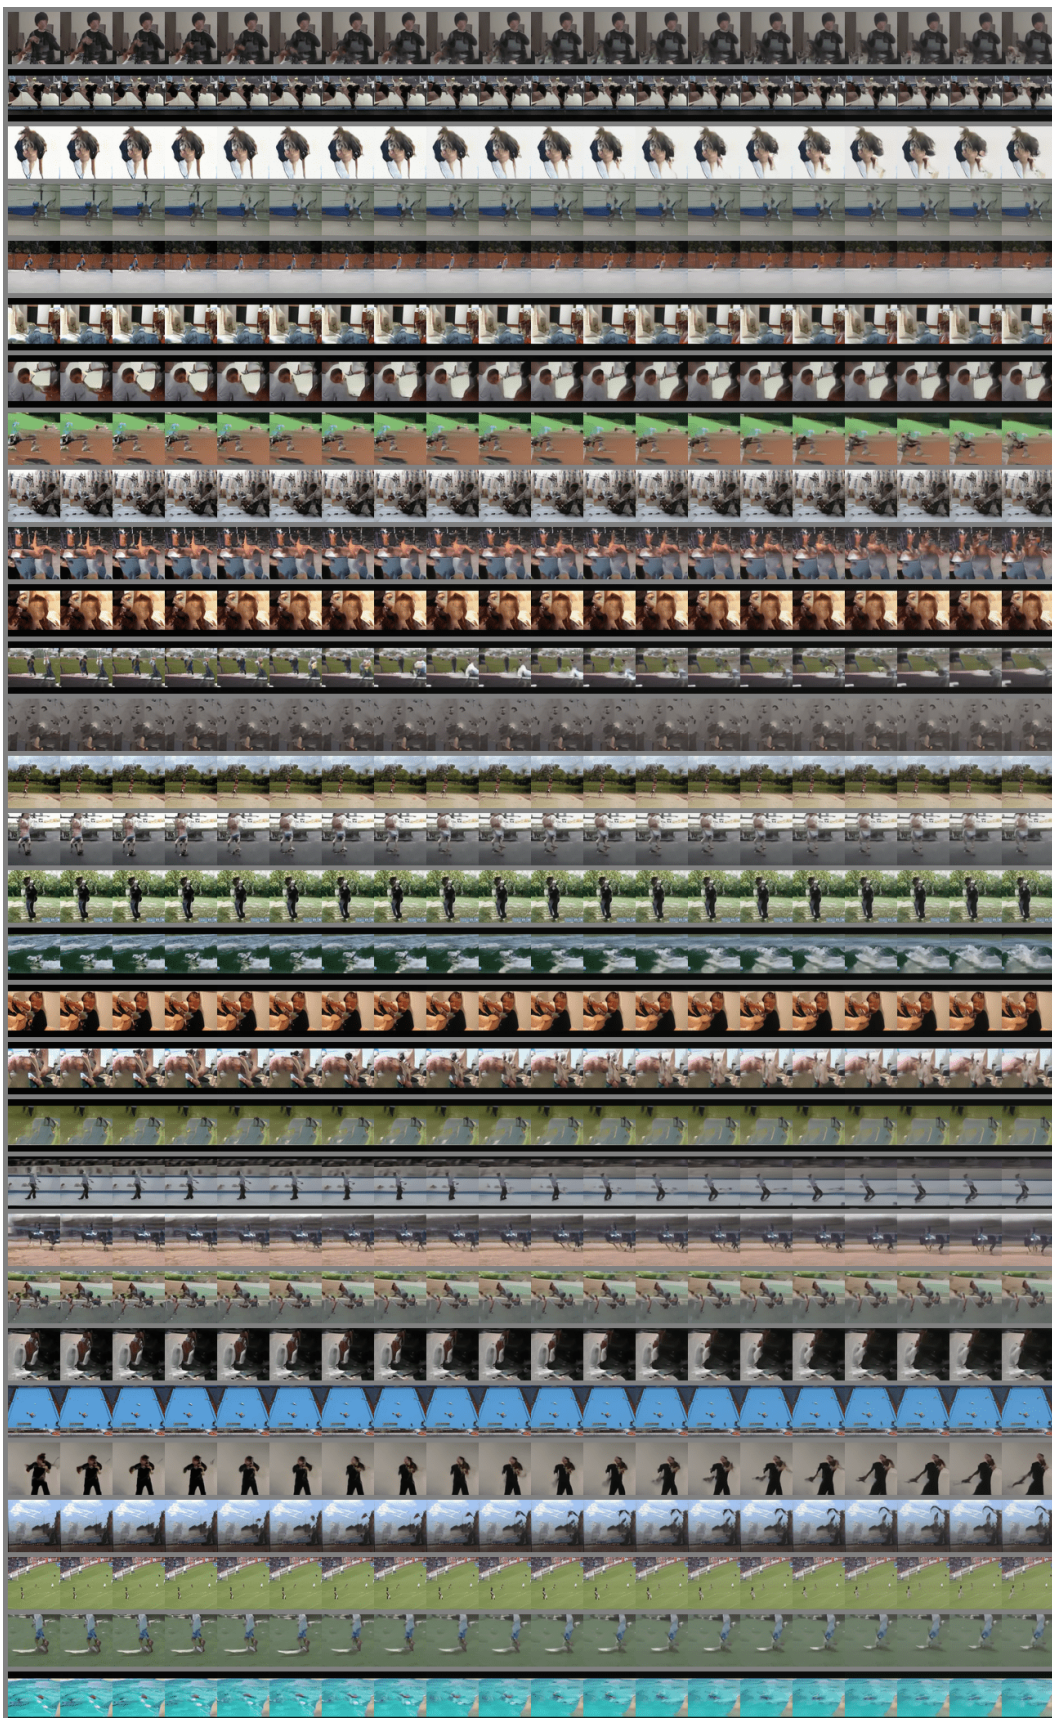

Figure 9: UCF-101 0  $\rightarrow$  4 (generation)

564 **A.6 Cityscapes**

565 Here we provide some examples of future frame prediction for Cityscapes sequences conditioning on  
566 two frames and predicting the next 7 frames.

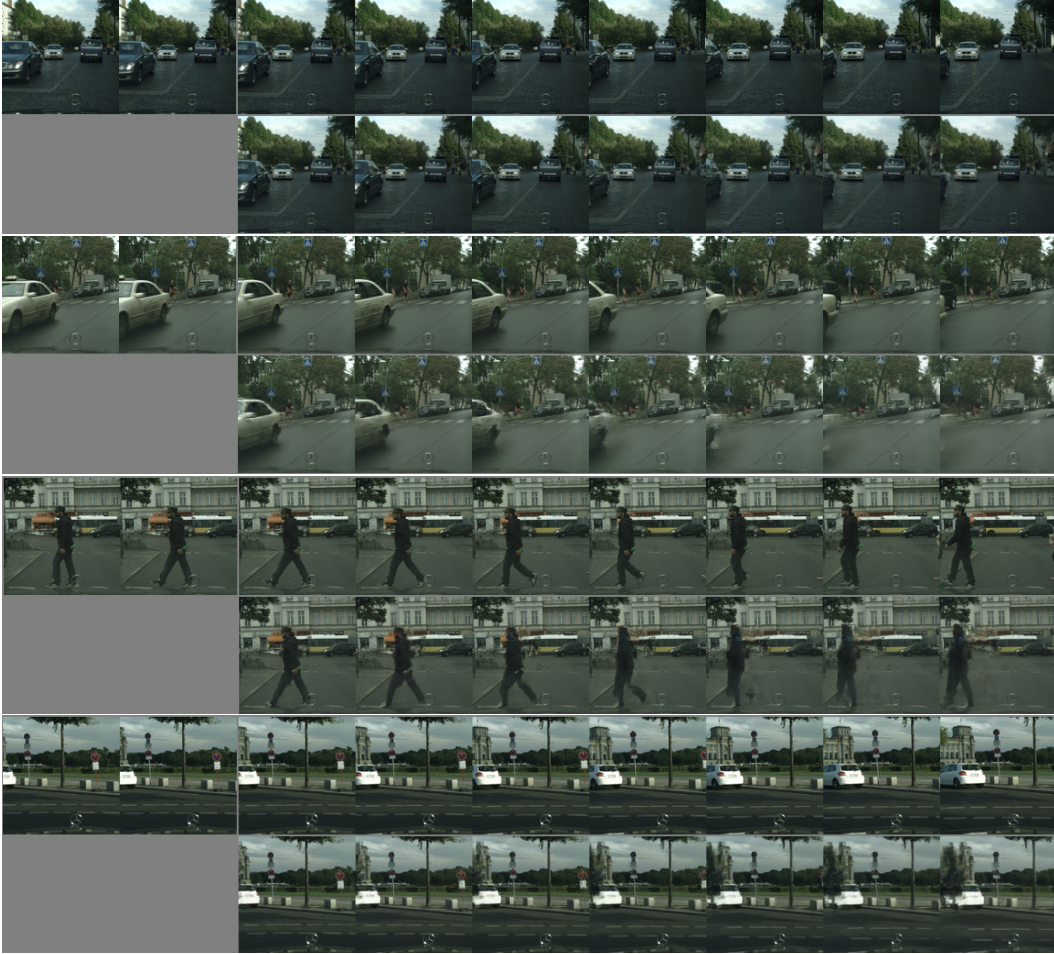

Figure 10: **Cityscapes**:  $2 \rightarrow 7$ , trained on 5; Conditioning on the two frames in the top left corner of each block of two rows of images, we generate the next 7 frames. The top row is the true frames, bottom row contains the generated frames. We use the **MCVD** concat model variant.
